# Supplementary material for: Diagnostic and prognostic biomarkers of Human Leukocyte Antigen complex for hepatitis B virus-related hepatocellular carcinoma
Source: PubMed Central journal article supplement (PMC6775598; doi:10.7150/jca.29655), 2019-08-28

## Supplementary Figure legends

**Table S1.** Demographic and clinical characteristics of 212 HCC patients.

**Figure S1.** Protein expressions of HLA family members in liver. A-N: HLA- B, DMA, DMB, DOA, DOB, DPA1, DPB1, DQA1, DQB1, DRA, DRB1, E, and G respectively.

**Figure S2.** Bodymap of HLA family members in human. A-R: *HLA-A, B, C, DMA, DMB, DOA, DOB, DPA1, DPB1, DQA1, DQB1, DQB2, DRA, DRB1, DRB6, E, F, G* respectively.

**Figure S3.** Gene set enrichment analysis results of *HLA-C* gene. A-L: Results of biological processes; M-P: Results of KEGG pathways.

**Figure S4.** Gene set enrichment analysis results of *HLA-DPA1* gene. A-L: Results of biological processes; M-P: Results of KEGG pathways.

**Figure S5.** Gene set enrichment analysis results of *HLA-DQA1* gene. A-J: Results of biological processes; K-L: Results of KEGG pathways.

**Figure S6.** GO terms of HLA family genes enriched. A: Biological process, B: Cellular component, C: Molecular function.

Table S1. Demographic and clinical characteristics of 212 HCC patients

| Variables               | Patients<br>(n=212) | Overall survival |                |                            |                | Recurrence-free survival |                |                            |                |
|-------------------------|---------------------|------------------|----------------|----------------------------|----------------|--------------------------|----------------|----------------------------|----------------|
|                         |                     | No. of<br>event  | MST<br>(month) | HR (95%CI)                 | <i>P</i> value | No. of<br>event          | MST<br>(month) | HR (95%CI)                 | <i>P</i> value |
| Gender                  |                     |                  |                |                            |                |                          |                |                            |                |
| Male                    | 183                 | 74               | NA             | Ref.                       |                | 106                      | 40.10          | Ref.                       |                |
| Female                  | 29                  | 8                | NA             | 0.587 (0.283-1.218)        | 0.152          | 10                       | NA             | <b>0.467 (0.244-0.893)</b> | <b>0.021</b>   |
| Age                     |                     |                  |                |                            |                |                          |                |                            |                |
| ≤60 years               | 175                 | 69               | NA             | Ref.                       |                | 96                       | 45.90          | Ref.                       |                |
| >60 years               | 37                  | 13               | NA             | 0.864 (0.478-1.564)        | 0.630          | 20                       | 48.00          | 0.974(0.602-1.578)         | 0.916          |
| HBV status              |                     |                  |                |                            |                |                          |                |                            |                |
| AVR-CC                  | 56                  | 25               | NA             | Ref.                       |                | 35                       | 28.80          | Ref.                       |                |
| CC                      | 156                 | 57               | NA             | 0.747 (0.467-1.196)        | 0.225          | 81                       | 51.10          | 0.751(0.505-1.117)         | 0.158          |
| Tumor size <sup>§</sup> |                     |                  |                |                            |                |                          |                |                            |                |
| ≤5 cm                   | 137                 | 46               | NA             | Ref.                       |                | 73                       | 51.10          | Ref.                       |                |
| >5 cm                   | 74                  | 36               | 53.30          | <b>1.975 (1.274-3.060)</b> | <b>0.002</b>   | 43                       | 28.40          | 1.409(0.966-2.056)         | 0.075          |
| Cirrhosis               |                     |                  |                |                            |                |                          |                |                            |                |

|                  |     |    |       |                             |                   |     |       |                            |                   |  |
|------------------|-----|----|-------|-----------------------------|-------------------|-----|-------|----------------------------|-------------------|--|
| Yes              | 195 | 80 | NA    | Ref.                        |                   | 111 | 37.90 | Ref.                       |                   |  |
| No               | 17  | 2  | NA    | <b>0.231 (0.057-0.939)</b>  | <b>0.041</b>      | 5   | NA    | <b>0.383(0.156-0.938)</b>  | <b>0.036</b>      |  |
| Multinodular     |     |    |       |                             |                   |     |       |                            |                   |  |
| Yes              | 45  | 23 | 47.90 | Ref.                        |                   | 26  | 28.70 | Ref.                       |                   |  |
| No               | 167 | 59 | NA    | 0.622 (0.384-1.008)         | 0.054             | 90  | 49.10 | 0.823(0.531-1.274)         | 0.382             |  |
| AFP <sup>£</sup> |     |    |       |                             |                   |     |       |                            |                   |  |
| ≤300 ng/ml       | 115 | 39 | NA    | Ref.                        |                   | 62  | 48.00 | Ref.                       |                   |  |
| >300 ng/ml       | 94  | 43 | NA    | <b>1.546 (1.002-2.385)</b>  | <b>0.049</b>      | 54  | 35.20 | 1.200(0.833-1.728)         | 0.328             |  |
| BCLC stage       |     |    |       |                             |                   |     |       |                            |                   |  |
| 0                | 20  | 2  | NA    | Ref.                        | <b>&lt;0.0001</b> | 6   | NA    | Ref.                       | <b>&lt;0.0001</b> |  |
| A                | 143 | 48 | NA    | <b>4.119(1.001-16.951)</b>  | <b>0.050</b>      | 74  | 51.60 | 2.050(0.892-4.711)         | 0.091             |  |
| B                | 22  | 12 | 46.10 | <b>8.992(2.005-40.320)</b>  | <b>0.004</b>      | 15  | 26.90 | <b>4.019(1.550-10.421)</b> | <b>0.004</b>      |  |
| C                | 27  | 20 | 13.60 | <b>18.993(4.419-81.632)</b> | <b>&lt;0.0001</b> | 21  | 8.90  | <b>6.163(2.477-15.333)</b> | <b>&lt;0.0001</b> |  |

Note: §: One data were missing; £: three data were missing.

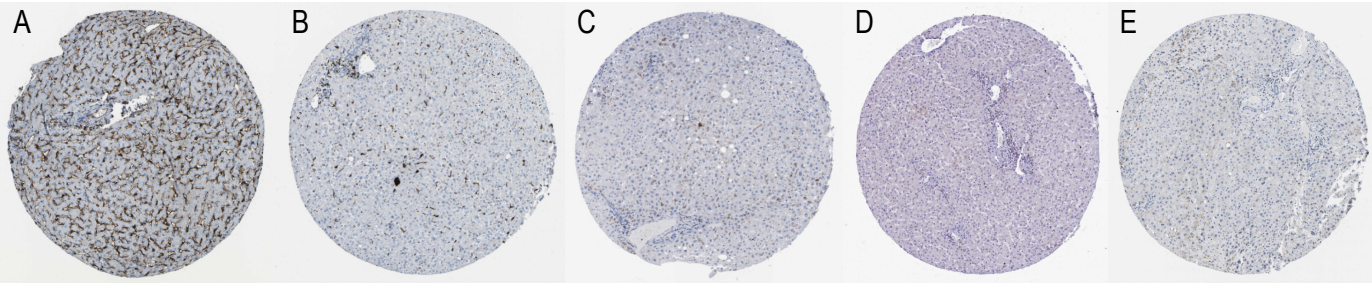

HLA-B

HLA-DMA

HLA-DMB

HLA-DOA

HLA-DOB

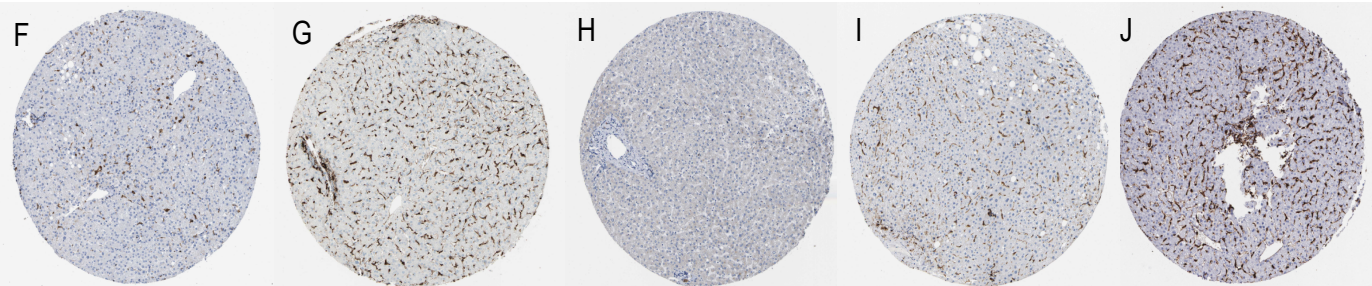

HLA-DPA1

HLA-DPB1

HLA-DQA1

HLA-DQB1

HLA-DRA

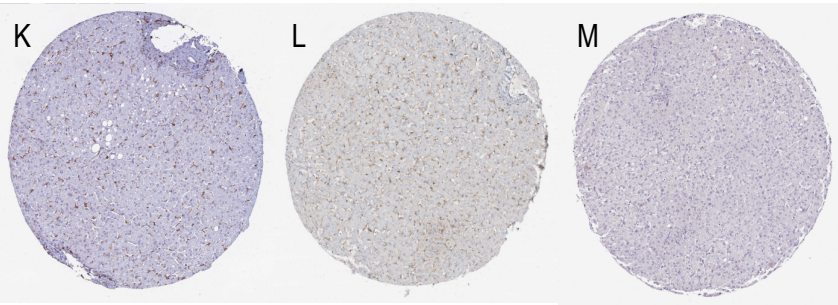

HLA-DRB1

HLA-E

HLA-G

A

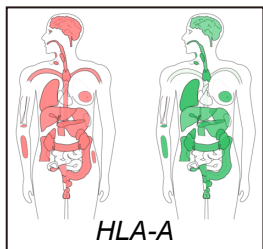

B

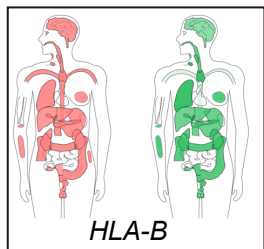

C

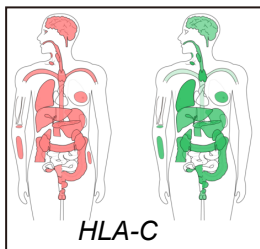

D

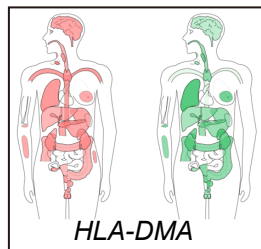

E

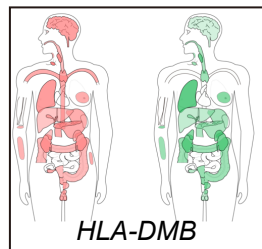

F

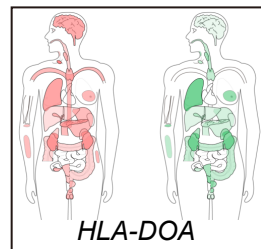

G

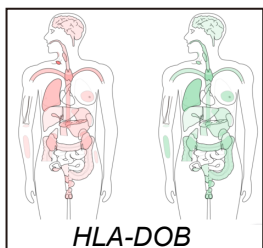

H

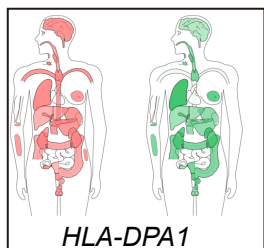

I

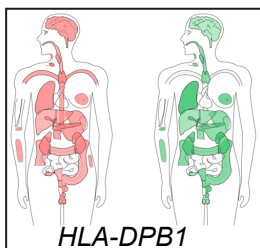

J

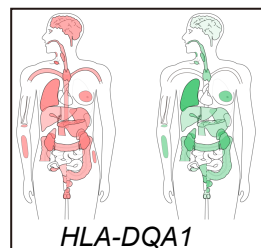

K

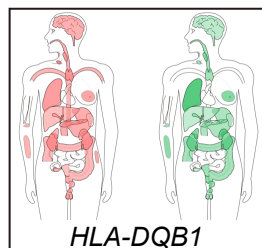

L

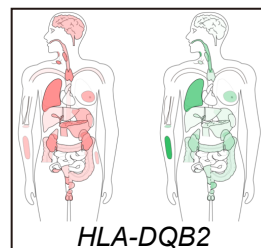

M

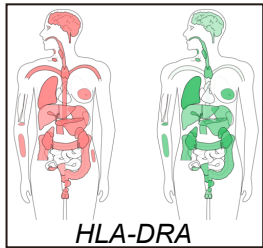

N

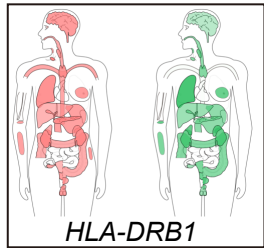

O

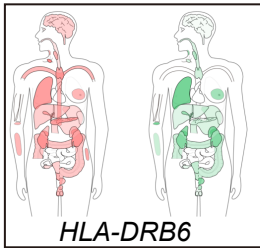

P

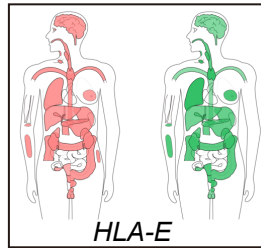

Q

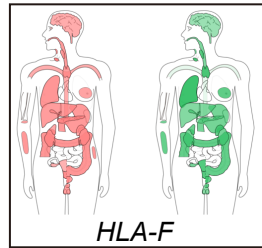

R

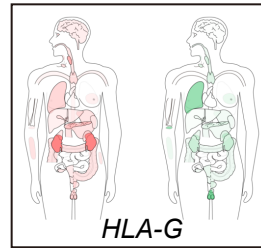

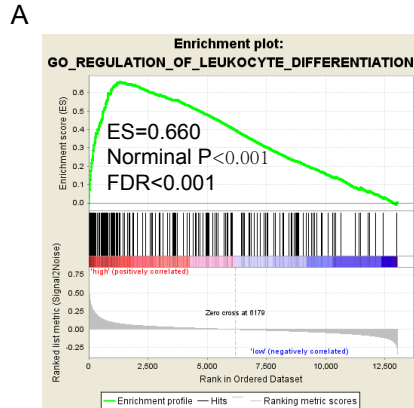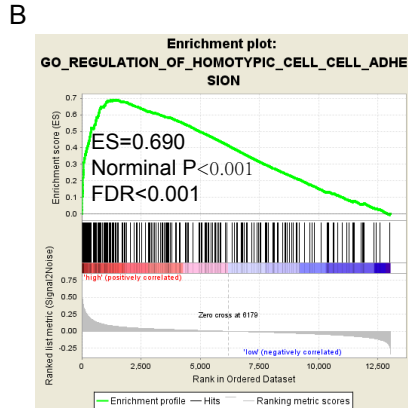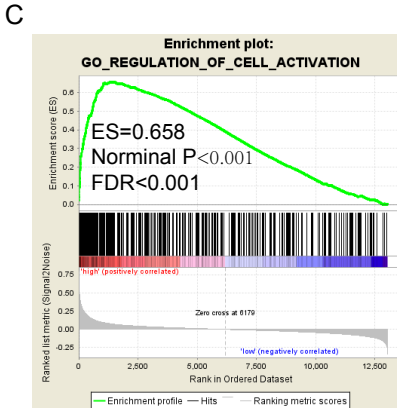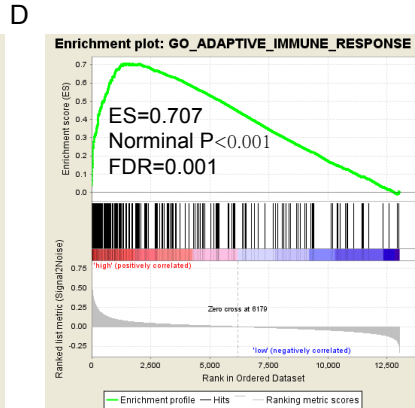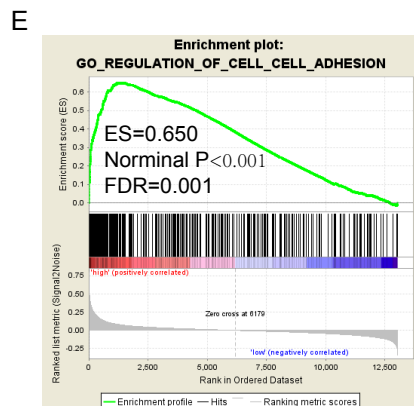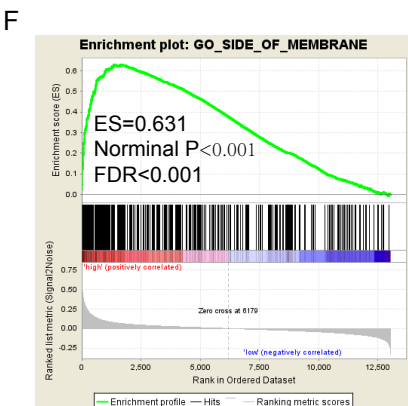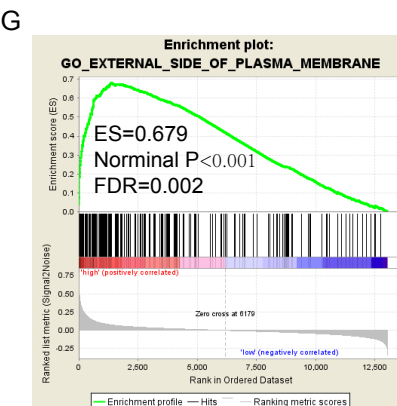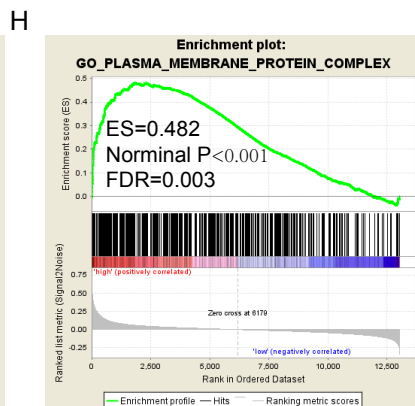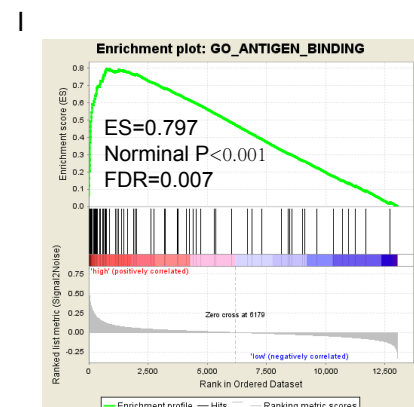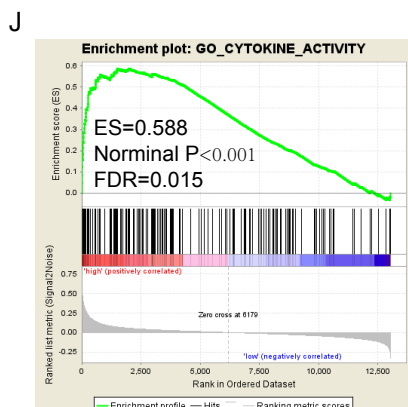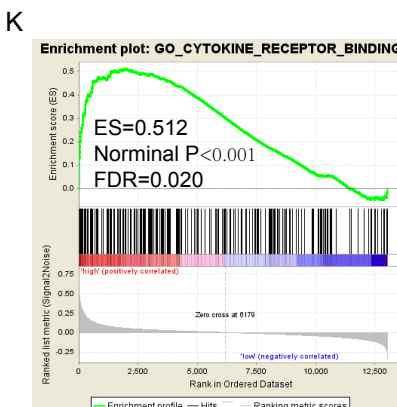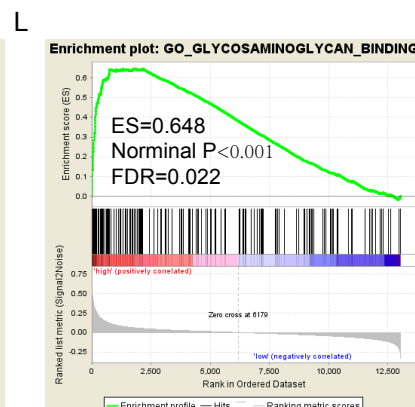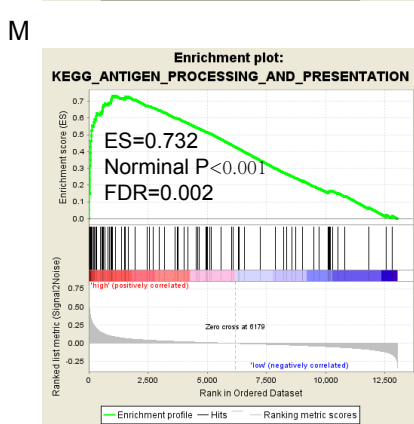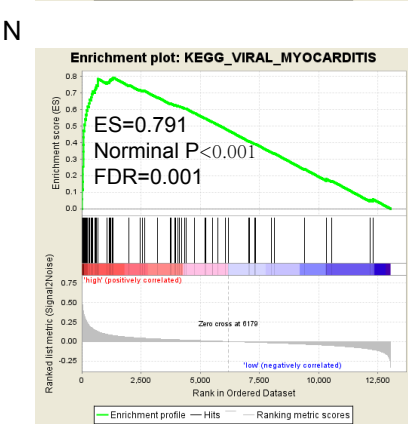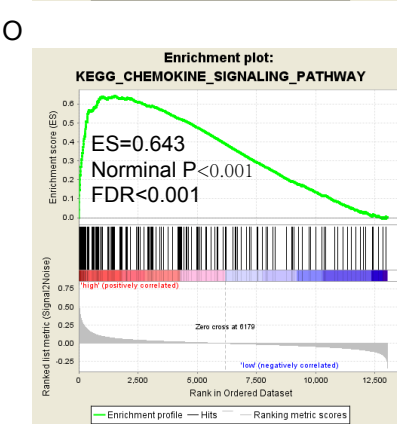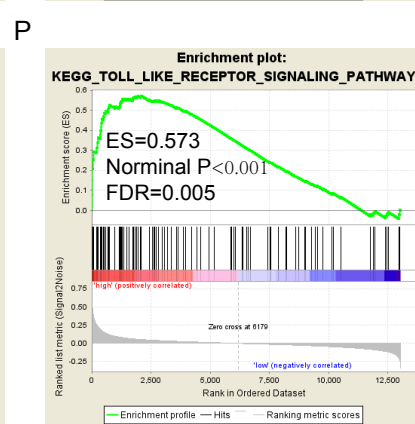

A

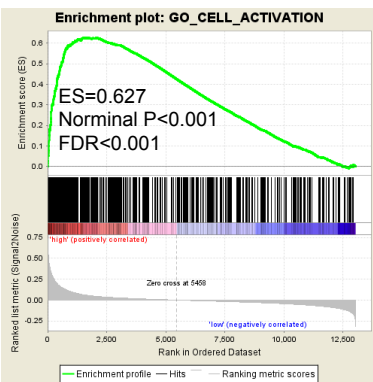

B

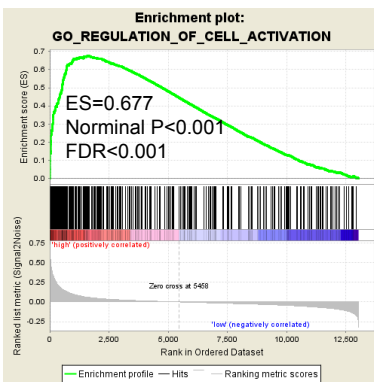

C

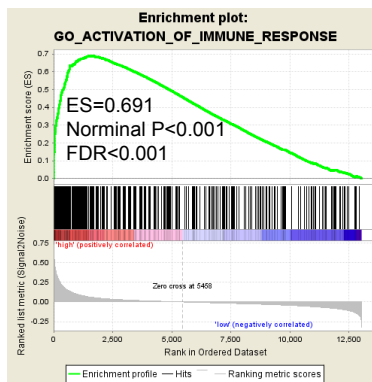

D

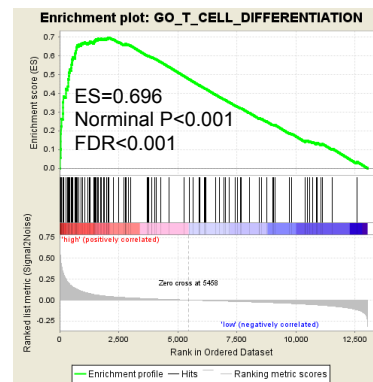

E

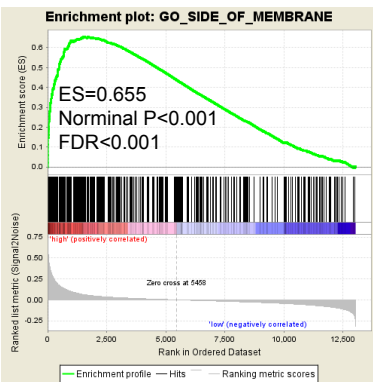

F

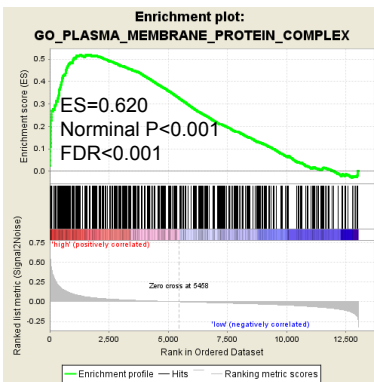

G

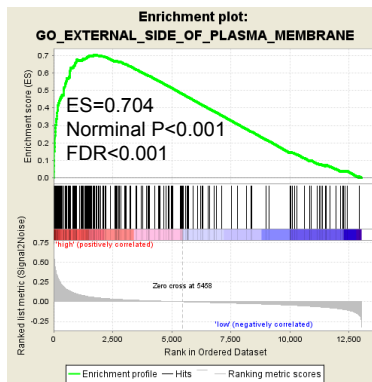

H

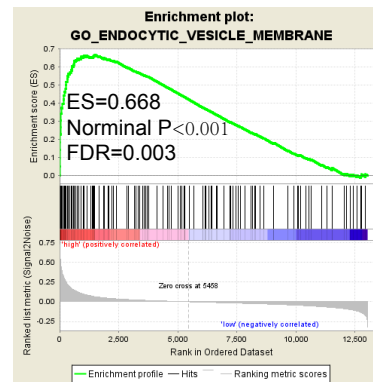

I

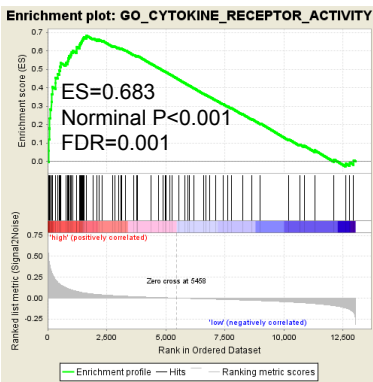

J

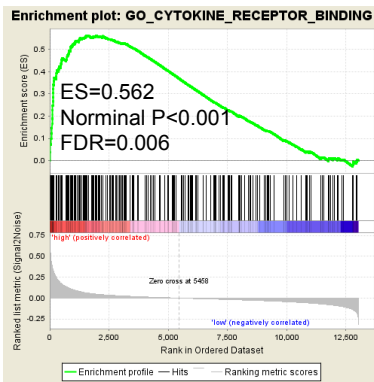

K

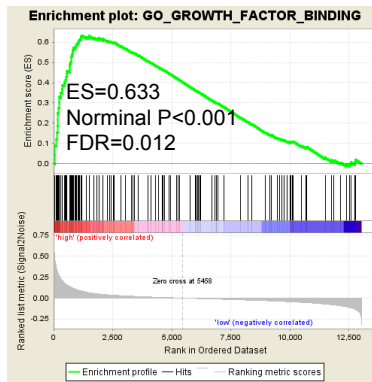

L

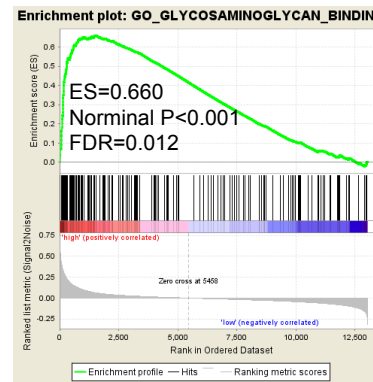

M

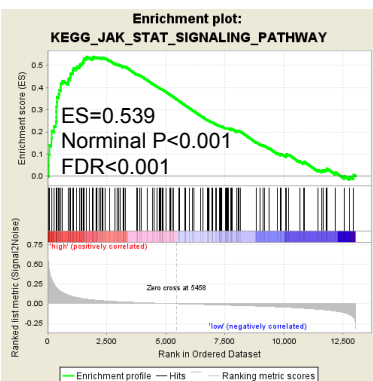

N

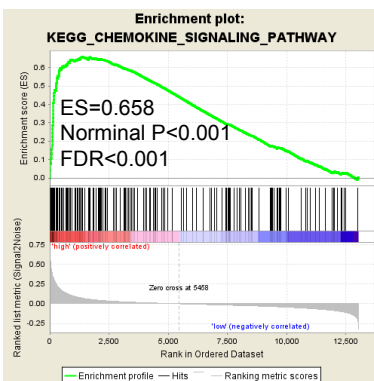

O

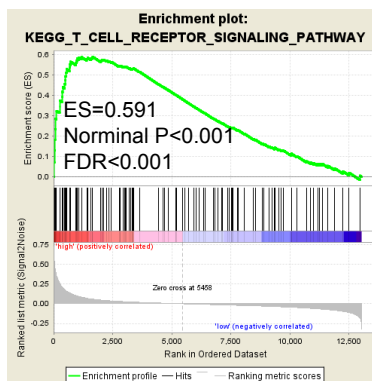

P

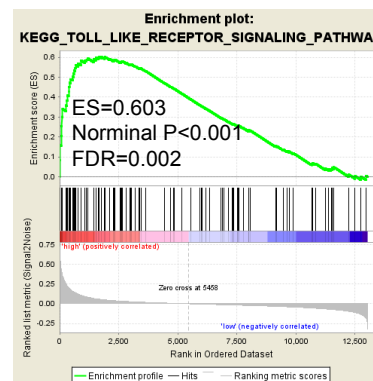

A

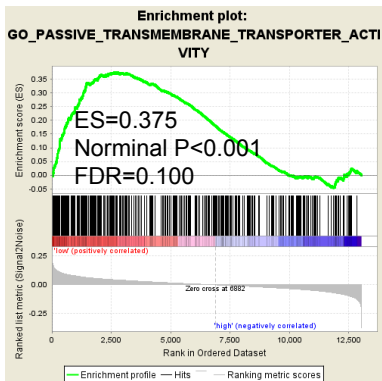

B

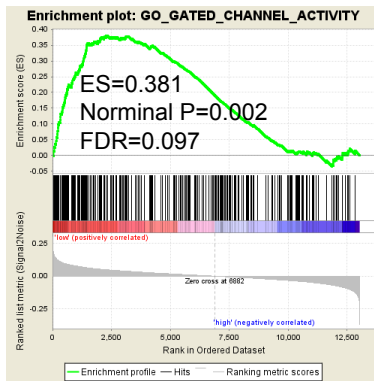

C

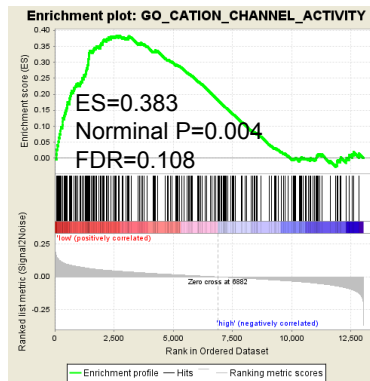

D

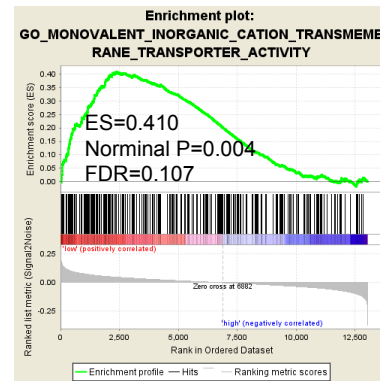

E

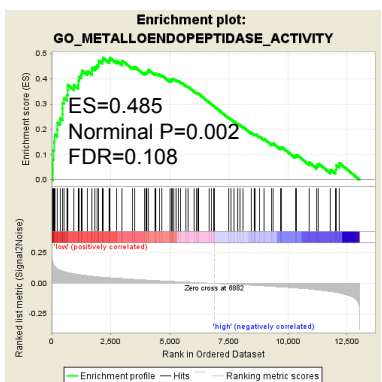

F

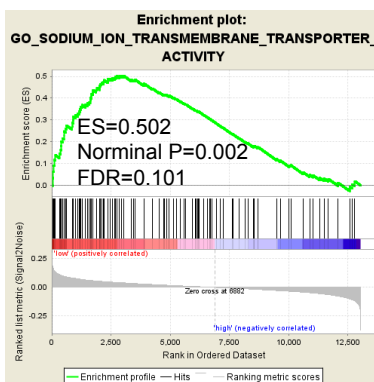

G

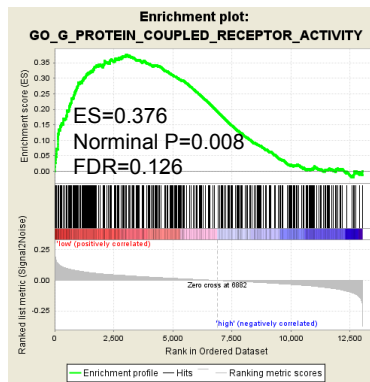

H

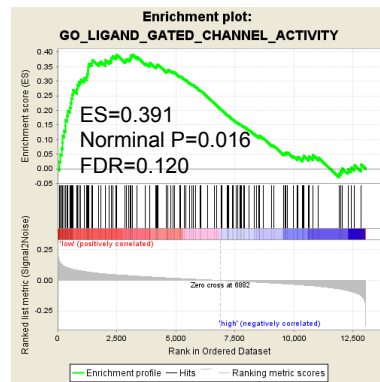

I

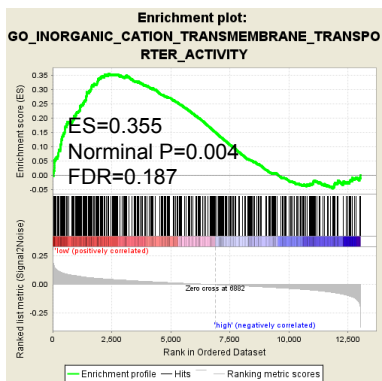

J

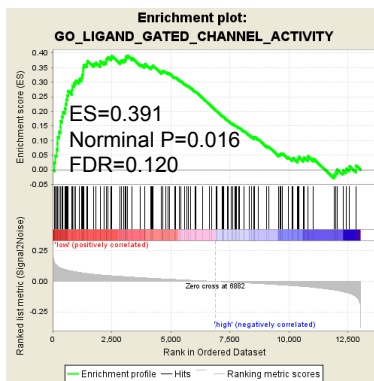

K

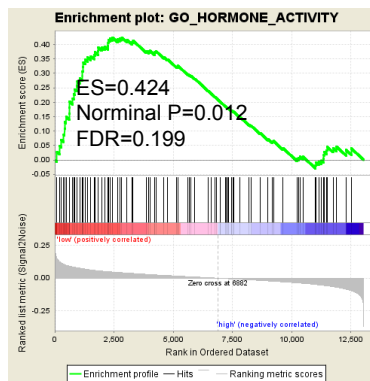

L

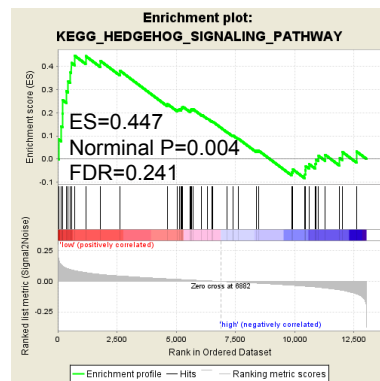



A

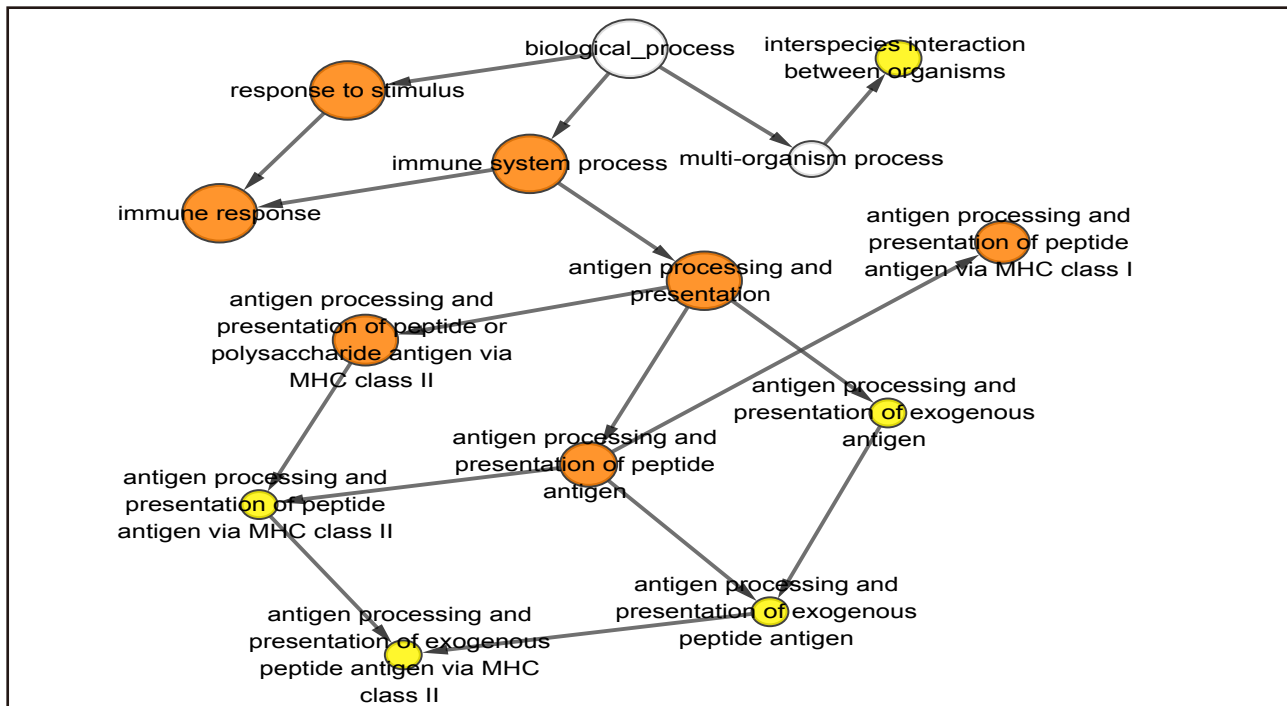

B

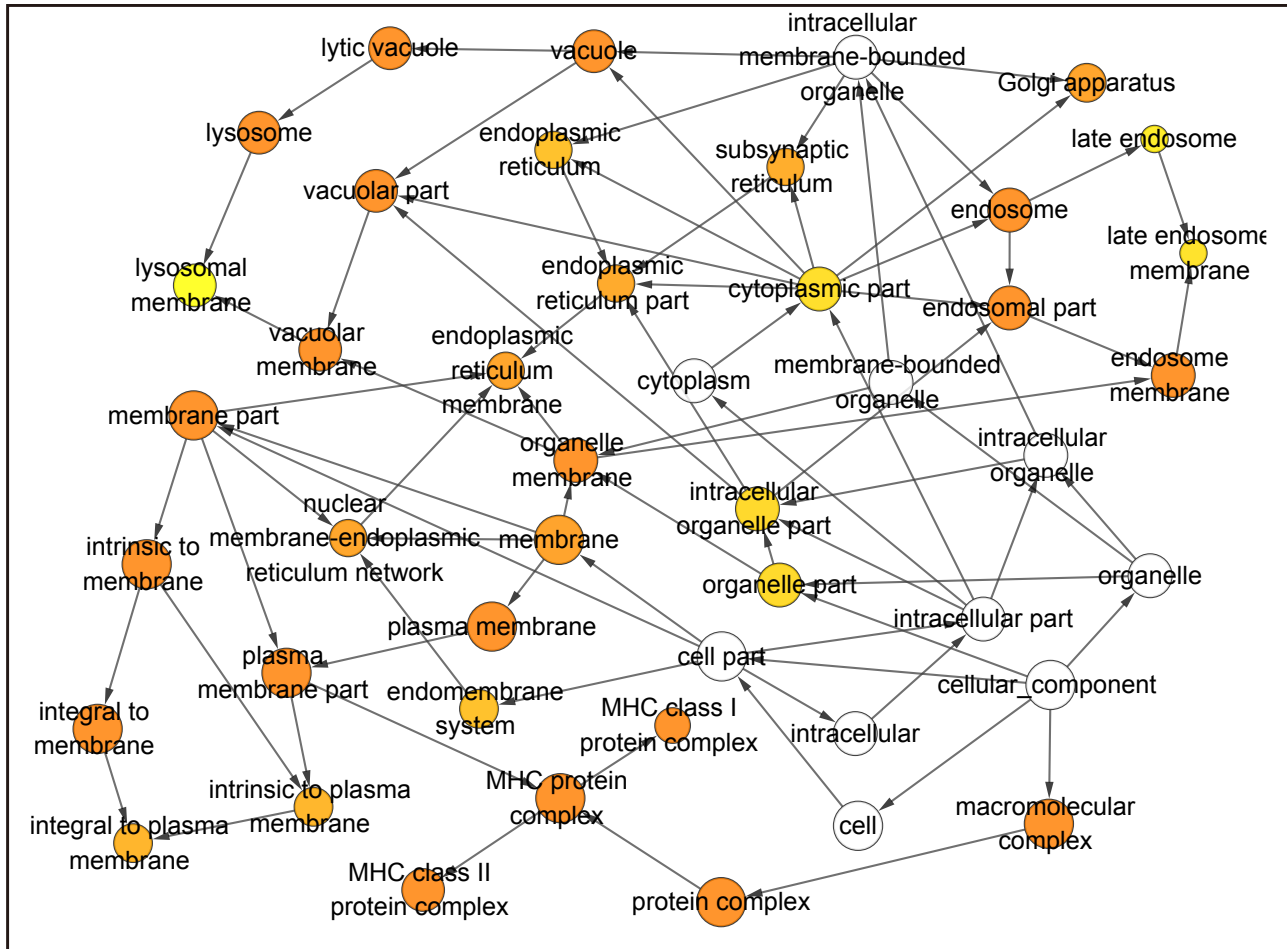

C

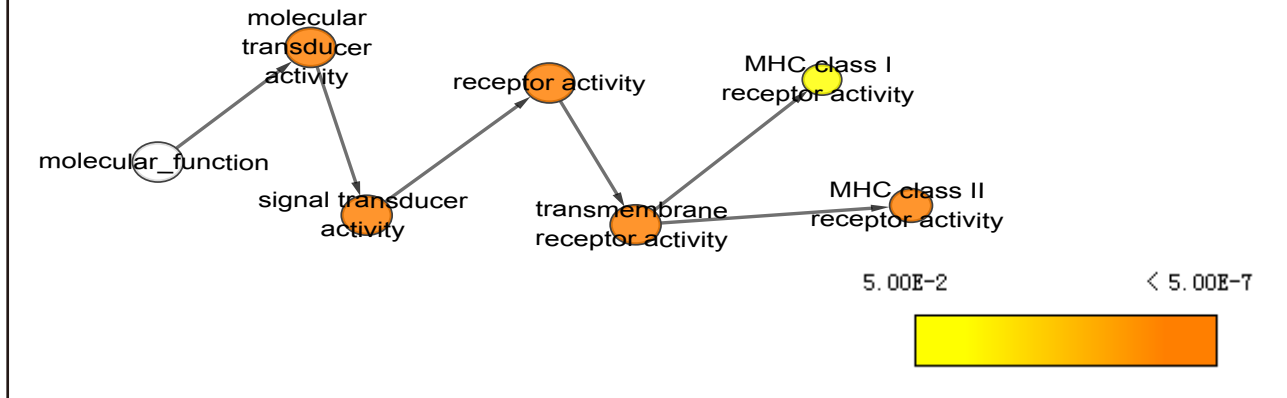

Supplement: jcav10p5173s1.pdf [file jcav10p5173s1.pdf]
